# Supplementary material
Source: Research Square preprint supplement (doi:10.21203/rs.3.rs-9419312/v1)
Supplement: Supplementary file 1 [file a3c6a4e7f51ba570be413fd5.docx]

**Integrated management of soybean root disease caused by *Fusarium ipomoeae* using biological and chemical control methods with a species-specific detection technique**

**Gyuri Hong1,2†, Sung-Won Park1,2†, Ju Gyeong Lee1,2, Minseo Cho1,2, Martin I. Chilvers3, Hyunkyu Sang1,2,4***

1Department of Integrative Food, Bioscience and Biotechnology, Chonnam National University, Gwangju, Republic of Korea, 61186

2Department of Integrative Food, Bioscience and Biotechnology and BK21 FOUR Program, Chonnam National University, Gwangju, South Korea

3Department of Plant, Soil and Microbial Sciences, Michigan State University, East Lansing, MI 48824

4Kumho Life Science Laboratory, Chonnam National University, Gwangju, Republic of Korea, 61186

*Corresponding author: Hyunkyu Sang, hksang@jnu.ac.kr

† These authors have contributed equally and shared first authorship.

**Supplementary Table S1. Primers and PCR conditions for molecular identification of *Fusarium* spp. and bacterial isolates.**

| **Gene** | **Primer** | **Primer sequence (5′–3′)** | **Annealing temp (℃)a** | **Amplicon size (bp)b** | **Reference** |
| --- | --- | --- | --- | --- | --- |
| *TEF1* | EF-1 | ATG GGT AAG GAR GAC AAG AC | 55 | 700 | [52] |
| EF-2 | GGA RGT ACC AGT SAT CAT GTT |
| *RPB2* | 5F2 | GGG GWG AYC AGA AGA AGG C | 55 | 900 | [53] |
| 7cR | CCC ATR GCT TGY TTR CCC AT |
| *CAL* | 228F | GAG TTC AAG GAG GCC TTC TCC C | 61 | 500 | [54] |
| 2Rd | TGR TCN GCC TCD CGG ATC ATC TC |
| 16S rRNA | 27F | AGA GTT TGA TCM TGG CTC AG | 55 | 1500 | [55] |
| 1492R | GGT TAC CTT GTT ACG ACT T |
| *gyrB* | up-1 | GAA GTC ATC ATG ACC GTT CTG CAY GCN GGN GGN AAR TTY GA | 63 | 1200 | [56,57] |
| up-2r | AGC AGG ATA CGG ATG TGC GAG CCR TCN ACR TCN GCR TCN GTC AT |  |
| *rpoD* | 70F | ACG ACT GAC CCG GTA CGC ATG TAY ATG MGN GAR ATG GGN CAN GT | 56 | 700 | [58] |
| 70R | ATA GAA ATA ACC AGA CGT AAG TTN GCY TCN ACC ATY TCY TTY TT |

Primer sequences, annealing temperatures, and expected amplicon sizes used for PCR amplification of target genes for the identification of *Fusarium* spp. and bacterial isolates. The *TEF1*, *RPB2*, and *CAL* genes were used for *Fusarium* isolates, while 16S rRNA, *gyrB*, and *rpoD* were used for bacterial identification.

ᵃ Annealing temperatures are shown for PCR performed using nPfu-Forte DNA polymerase, except for *rpoD*, which was amplified using Phusion High-Fidelity DNA Polymerase.

ᵇ Expected amplicon sizes are approximate and may vary depending on the target organism and primer binding region

**Supplementary Table S2. Species complexes, locations, and substrates of *Fusarium* isolates from soybean fields in Gimje, Korea.**

| **Isolate** | **Complexa** | **Locationb** | **Substratec** |
| --- | --- | --- | --- |
| CMML23-12 | FFSC | A | Root (D) |
| CMML23-13 | FNSC | A | Soil (D) |
| CMML23-14 | FSSC | A | Root (D) |
| CMML23-15 | FSSC | A | Root (D) |
| CMML23-16 | FNSC | A | Soil (D) |
| CMML23-17 | FSSC | A | Root (D) |
| CMML23-18 | FSSC | A | Soil (D) |
| CMML23-19 | FSSC | A | Soil (D) |
| CMML23-20 | FNSC | A | Soil (D) |
| CMML23-21 | FSSC | A | Soil (D) |
| CMML23-22 | FSSC | A | Root (D) |
| CMML23-23 | FSSC | A | Soil (D) |
| CMML23-24 | FNSC | A | Soil (D) |
| CMML23-25 | FSSC | A | Root (H) |
| CMML23-26 | FIESC | B | Soil (D) |
| CMML23-27 | FIESC | B | Soil (D) |
| CMML23-28 | FOSC | B | Soil (D) |
| CMML23-29 | FIESC | B | Soil (D) |
| CMML23-30 | FSSC | B | Root (D) |
| CMML23-31 | FNSC | B | Soil (D) |
| CMML23-32 | FSSC | B | Root (D) |
| CMML23-33 | FIESC | B | Soil (D) |
| CMML23-34 | FNSC | B | Soil (D) |
| CMML23-35 | FSSC | B | Root (D) |
| CMML23-36 | FNSC | B | Soil (D) |
| CMML23-37 | FSSC | B | Soil (D) |
| CMML23-38 | FSSC | B | Soil (D) |
| CMML23-39 | FSSC | B | Soil (D) |
| CMML23-40 | FSSC | B | Root (D) |
| CMML23-41 | FSSC | B | Root (D) |
| CMML23-42 | FOSC | B | Root (H) |
| CMML23-43 | FSSC | C | Root (H) |
| CMML23-44 | FSSC | C | Root (H) |
| CMML23-45 | FSSC | C | Root (H) |
| CMML23-46 | FSSC | C | Root (H) |
| CMML23-47 | FSSC | C | Root (H) |
| CMML23-48 | FSSC | C | Root (H) |
| CMML23-49 | FSSC | C | Root (H) |

a Species complex assignment was based on *TEF1*-based phylogenetic analysis.

b A–C indicate soybean fields as described in the Materials and Methods.

c Latter in parentheses indicate the health status of the substrate: D for diseased, H for healthy

**Supplementary Table S3. Soybean-associated bacterial isolates from soybean fields in Gimje, Republic of Korea.**

| **Isolate** | **Locationa** | **Source** | **Soybean health status** |
| --- | --- | --- | --- |
| CMML23-50 | A | Endophytic | Diseased |
| CMML23-51 | A | Endophytic | Diseased |
| CMML23-52 | A | Endophytic | Diseased |
| CMML23-53 | A | Endophytic | Diseased |
| CMML23-54 | A | Endophytic | Diseased |
| CMML23-55 | A | Endophytic | Diseased |
| CMML23-56 | A | Endophytic | Healthy |
| CMML23-57 | A | Endophytic | Healthy |
| CMML23-58 | A | Endophytic | Healthy |
| CMML23-59 | A | Rhizoplane | Diseased |
| CMML23-60 | A | Rhizoplane | Diseased |
| CMML23-61 | A | Rhizoplane | Diseased |
| CMML23-62 | A | Rhizoplane | Diseased |
| CMML23-63 | A | Rhizoplane | Diseased |
| CMML23-64 | A | Rhizoplane | Diseased |
| CMML23-65 | A | Rhizoplane | Diseased |
| CMML23-66 | A | Rhizoplane | Diseased |
| CMML23-67 | A | Rhizoplane | Healthy |
| CMML23-68 | B | Endophytic | Diseased |
| CMML23-69 | B | Endophytic | Diseased |
| CMML23-70 | B | Endophytic | Diseased |
| CMML23-71 | B | Endophytic | Diseased |
| CMML23-72 | B | Endophytic | Diseased |
| CMML23-73 | B | Endophytic | Diseased |
| CMML23-74 | B | Endophytic | Diseased |
| CMML23-75 | B | Endophytic | Diseased |
| CMML23-76 | B | Endophytic | Diseased |
| CMML23-77 | B | Endophytic | Healthy |
| CMML23-78 | B | Endophytic | Healthy |
| CMML23-79 | B | Endophytic | Healthy |
| CMML23-80 | B | Rhizoplane | Diseased |
| CMML23-81 | B | Rhizoplane | Diseased |
| CMML23-82 | C | Endophytic | Healthy |
| CMML23-83 | C | Endophytic | Healthy |
| CMML23-84 | C | Endophytic | Healthy |
| CMML23-85 | C | Endophytic | Healthy |
| CMML23-86 | C | Endophytic | Healthy |
| CMML23-87 | C | Endophytic | Healthy |
| CMML23-88 | C | Endophytic | Healthy |
| CMML23-89 | C | Endophytic | Healthy |
| CMML23-90 | C | Endophytic | Healthy |
| CMML23-91 | C | Endophytic | Healthy |

a A–C indicate soybean fields as described in the Materials and Methods.


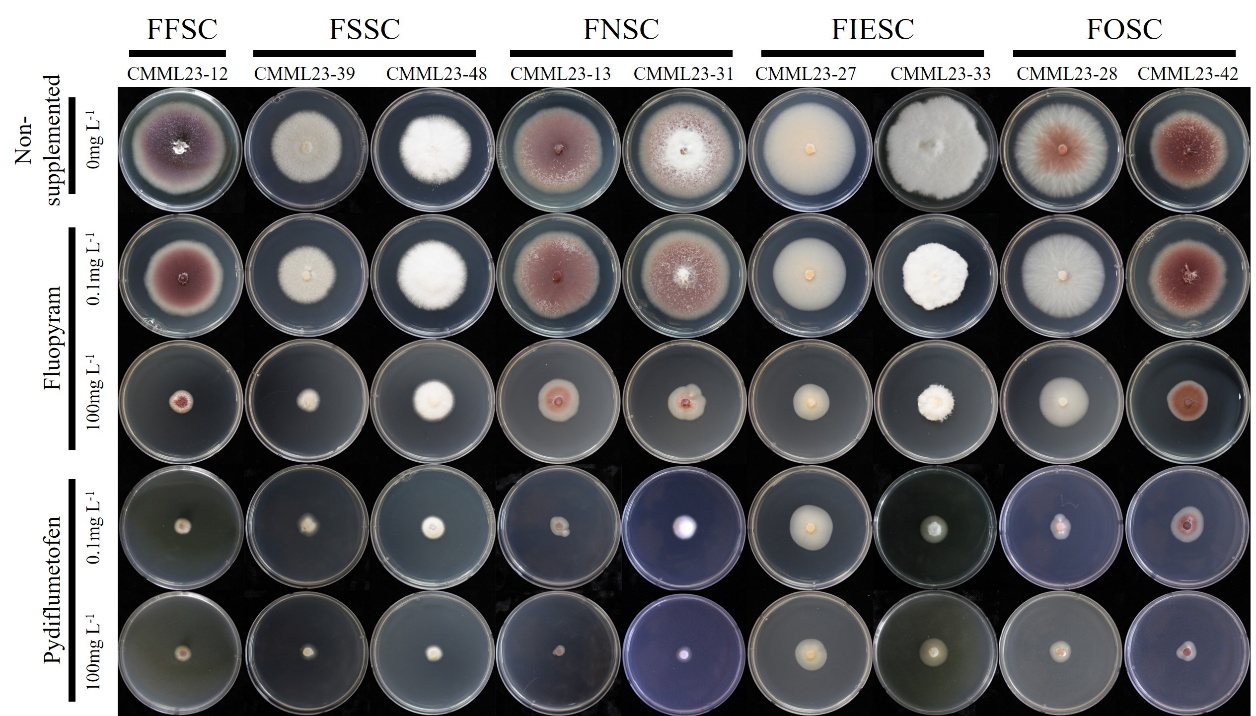


**Supplementary Fig. S1. Mycelial growth of *Fusarium* isolates under fungicide treatments.** Representative isolates from each *Fusarium* species complex were grown under non-supplemented conditions and on media supplemented with fluopyram or pydiflumetofen at concentrations of 0.1 and 100 mg L⁻¹.


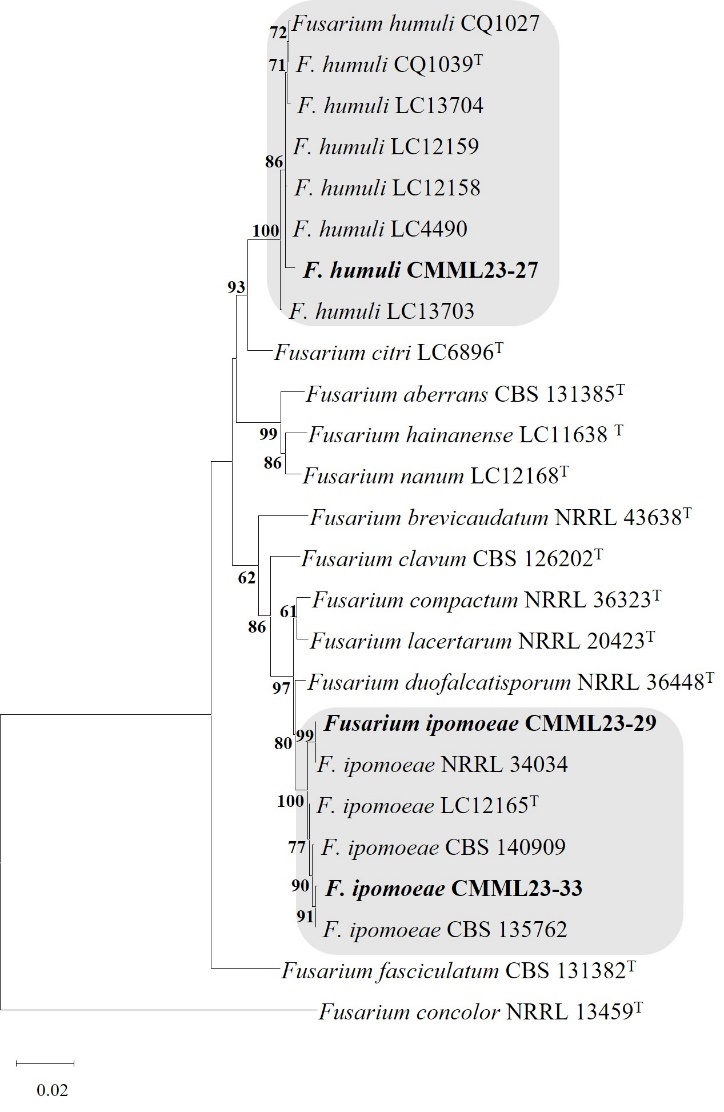


**Supplementary Fig. S2.** **Multi-gene maximum-likelihood phylogenetic tree of FIESC isolates*.*** The phylogenetic tree was constructed in MEGA X using combined sequences of the *RPB2*, *CAL*, and *TEF* genes for FIESC isolates CMML23-27, CMML23-29, and CMML23-33. Bootstrap analysis was performed with 1,000 replicates, and values ≥ 50 shown at the nodes. Type strains are indicated with the letter “T”. Isolates from this study are shown in bold. *Fusarium concolor* used as the outgroup. The scale bar indicates genetic distance, with 0.02 substitutions per site.

***
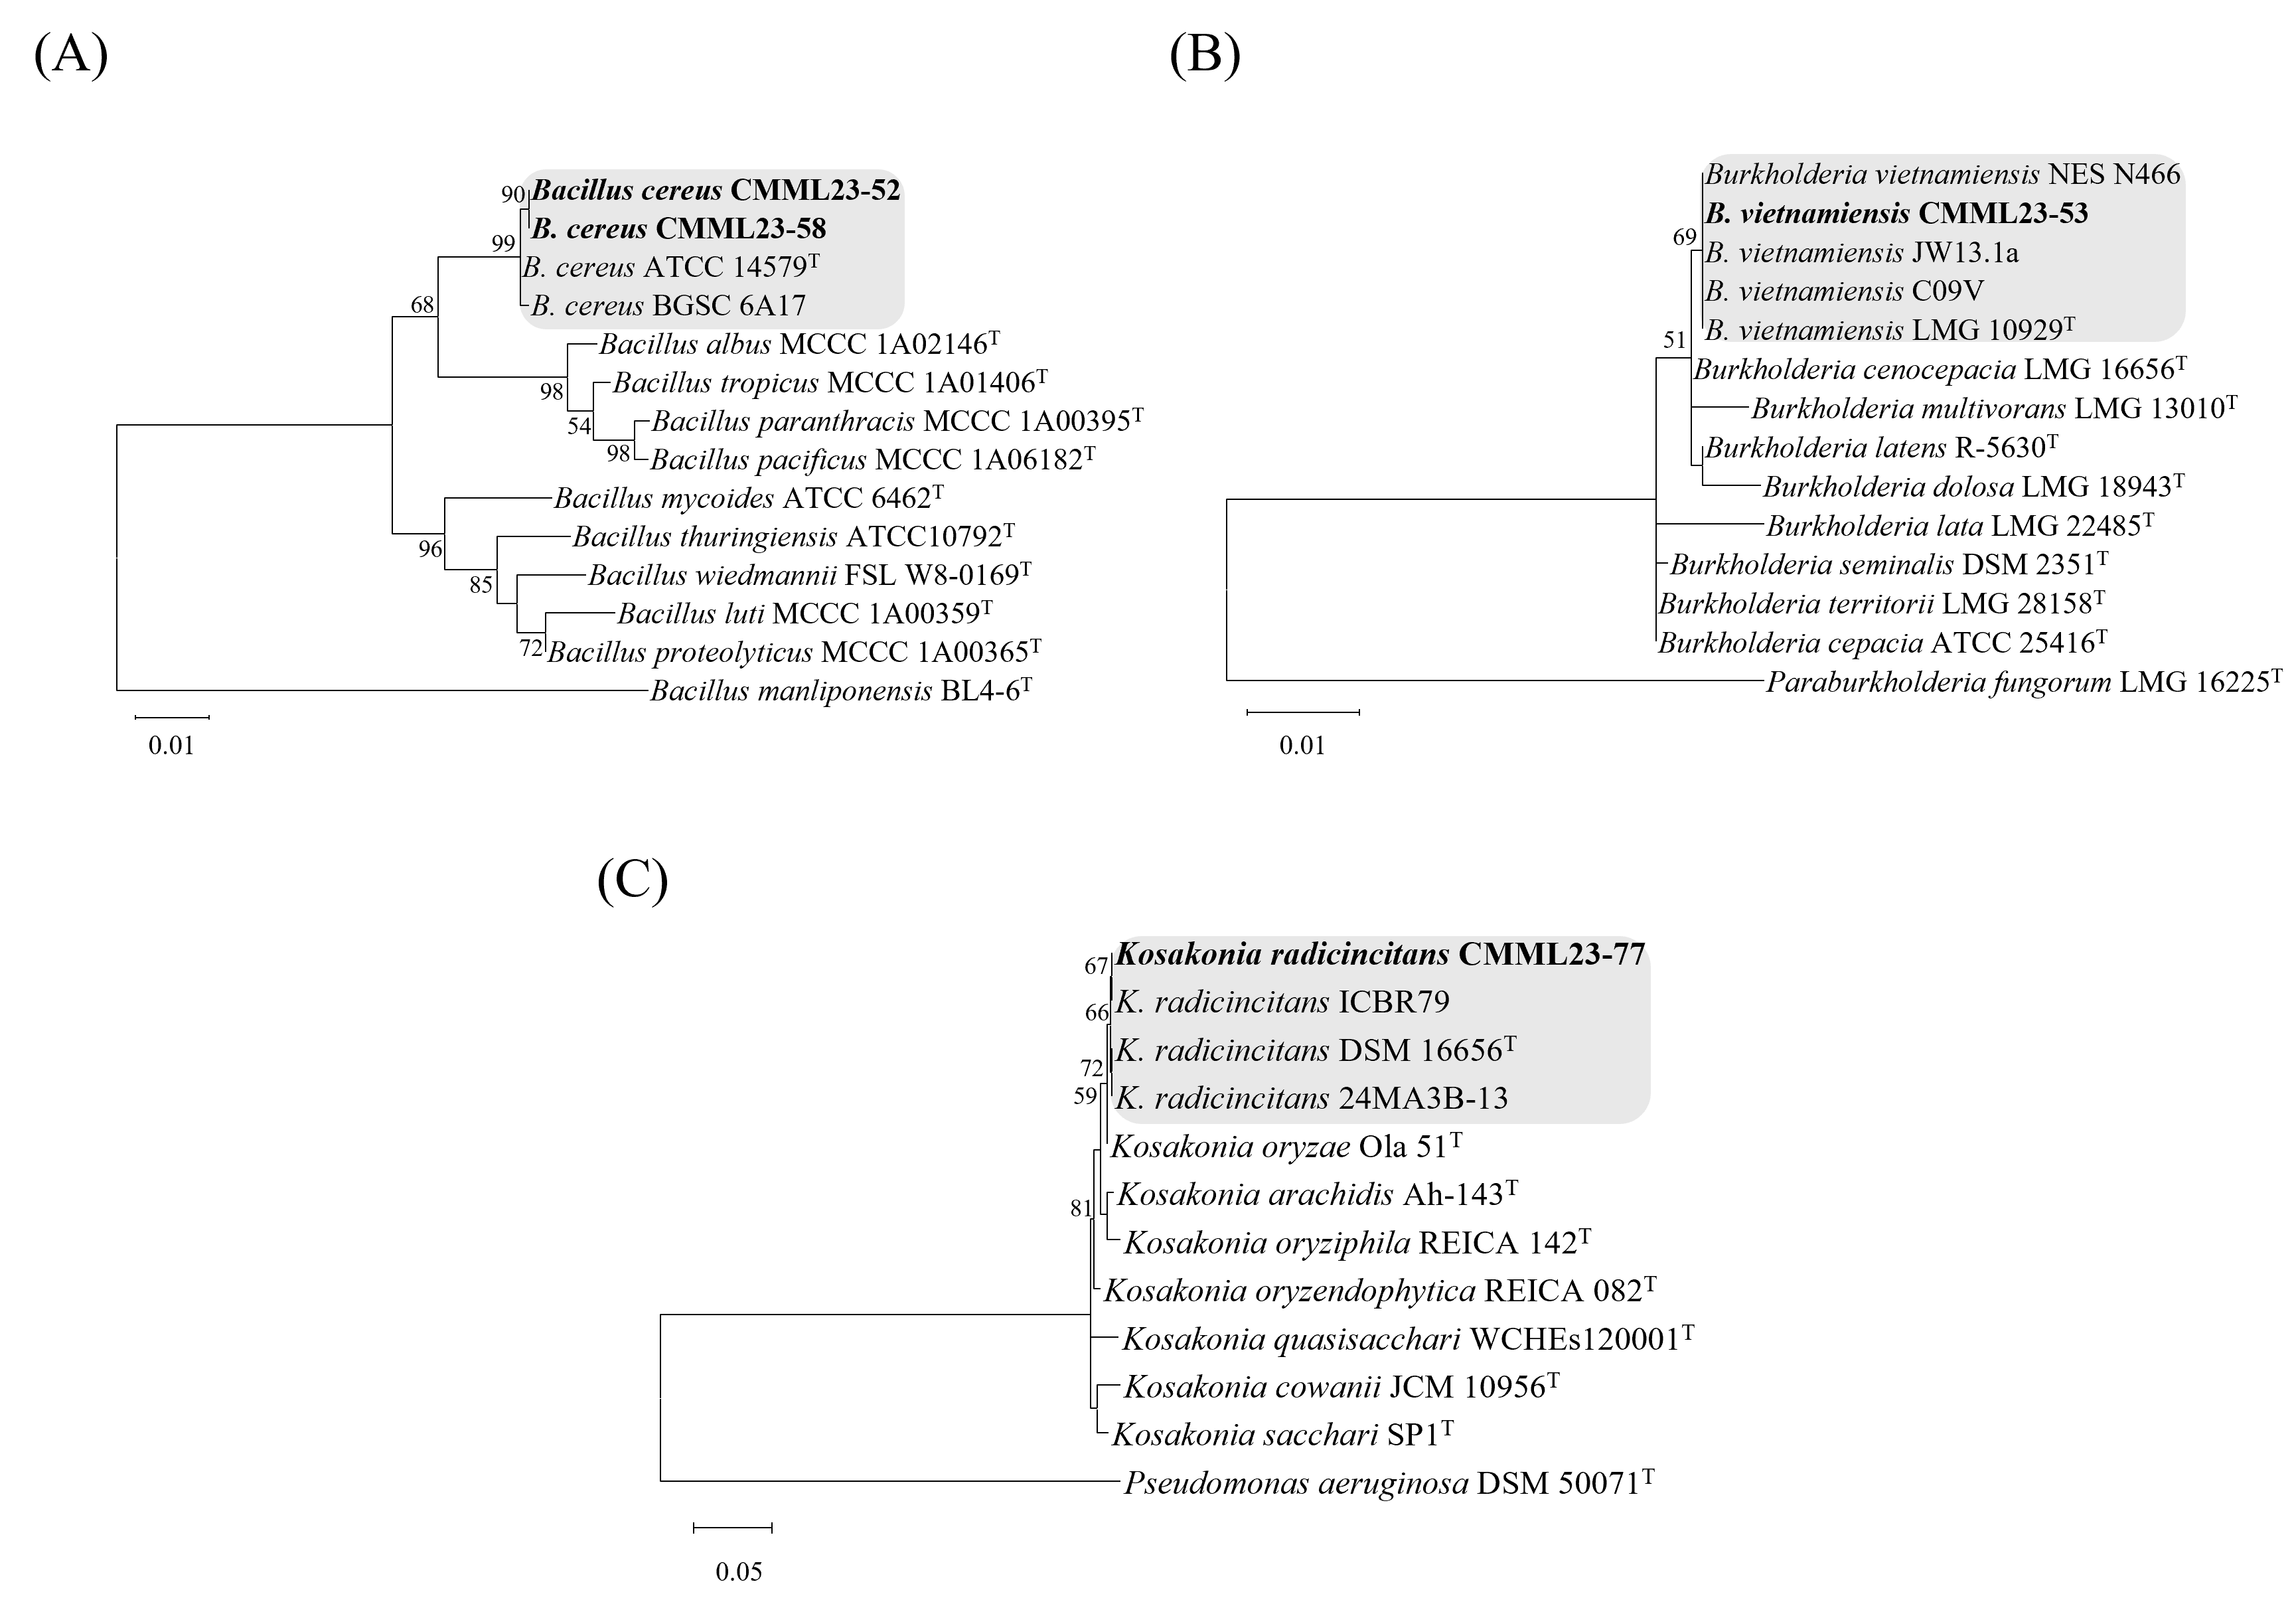
***

**Supplementary Fig. S3.** **Phylogenetic identification of four antagonistic bacterial isolates.** (A) *Bacillus* phylogeny was inferred from concatenated alignments of 16S rRNA and *gyrB* gene sequences. (B) *Burkholderia* and (C) *Kosakonia* phylogenies were reconstructed based on 16S rRNA gene sequences. *Bacillus manliponensis*, *Paraburkholderia fungorum*, and *Pseudomonas aeruginosa* were used as the outgroups for panels (A)–(C), respectively. Type strains are indicated by the superscript “T”, and bootstrap values above 50% (1,000 replicates) are shown at the nodes.

***
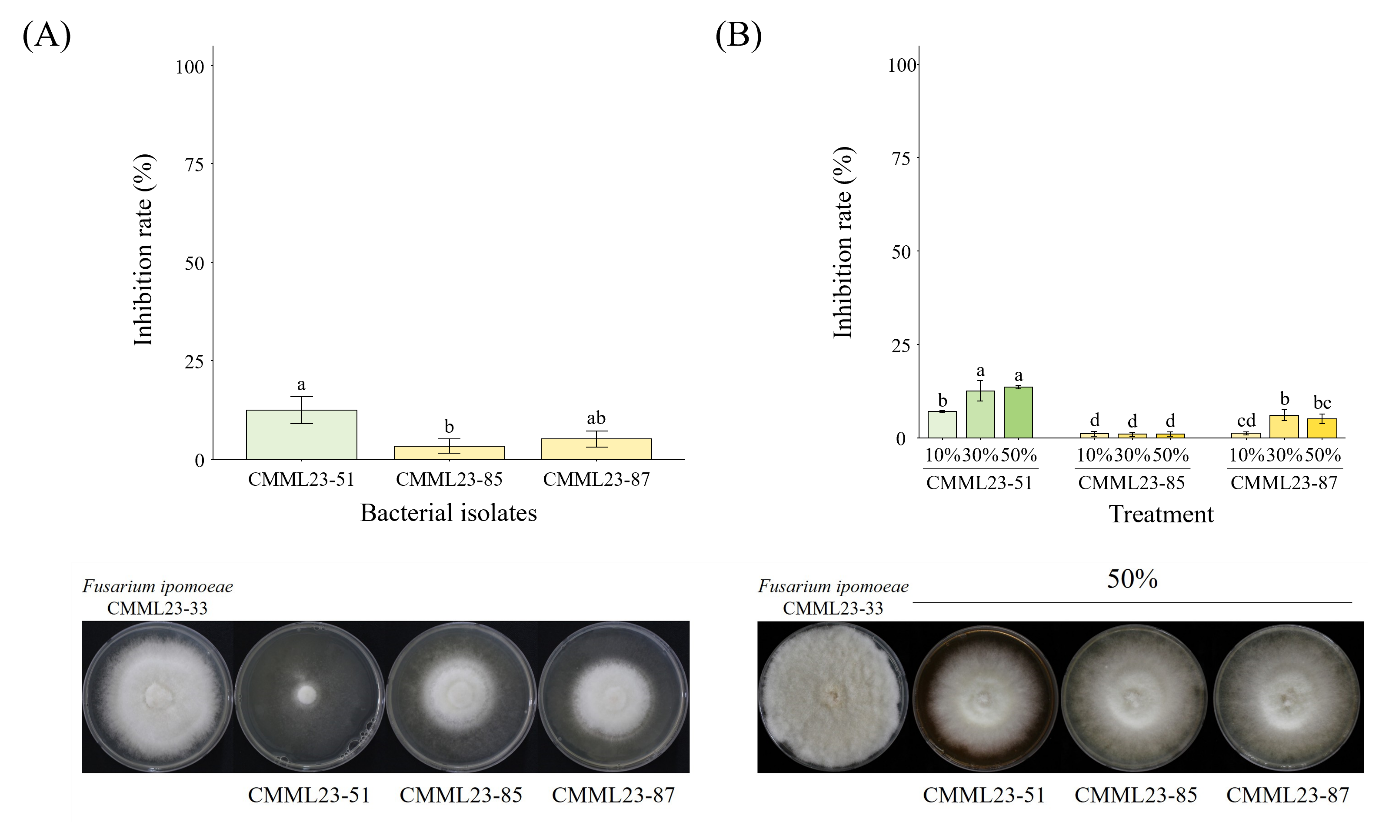
***

**Supplementary Fig. S4. In vitro antifungal activity of bacterial isolates CMML23-51, CMML23-85, and CMML23-87 against *Fusarium ipomoeae* CMML23-33.** (A) Volatile organic compounds (VOC)-mediated inhibition assay. (B) Culture filtrate assay using 10%, 30%, and 50% filtrate concentrations. Inhibition rate(%) indicates the relative reduction in mycelial growth compared with the uninoculated control. Representative images corresponding to each assay are shown below the bar graphs; for panel (B), images correspond to the 50% culture filtrate treatment. Different letters above bars indicate significant differences (*P* < 0.05; Fisher’s LSD test).
